# Supplementary material for: In Vitro Pharmacological Screening of Essential Oils from Baccharis parvidentata and Lippia origanoides Growing in Brazil
Source: MDPI journal article supplement (doi:10.3390/molecules27061926), 2022-03-16
Supplement: s1 [file s1]

Table S1. Chemical composition of the essential oils from *Baccharis parvidentata* (EO-Bp) and *Lippia organoides* (EO-Lo), growing in Brazil.

| Compound                             | RI <sub>calc</sub> | RI <sub>lit</sub> | GC peak area (%)       |                      |
|--------------------------------------|--------------------|-------------------|------------------------|----------------------|
|                                      |                    |                   | <i>B. parvidentata</i> | <i>L. organoides</i> |
| $\alpha$ -thujene                    | 929                | 924               | 0.8                    | -                    |
| $\alpha$ -pinene                     | 936                | 932               | 3.5                    | 1.1                  |
| camphene                             | 951                | 946               | 0.1                    | 0.2                  |
| <b>sabinene</b>                      | 975                | 969               | <b>15.2</b>            | 0.1                  |
| <b><math>\beta</math>-pinene</b>     | 978                | 974               | <b>9.2</b>             | 0.4                  |
| myrcene                              | 991                | 988               | 2.1                    | -                    |
| $\alpha$ -phellandrene               | 1005               | 1002              | 0.2                    | -                    |
| <b><math>\delta</math>-3-carene</b>  | 1012               | 1008              | <b>5.7</b>             | -                    |
| $\alpha$ -terpinene                  | 1018               | 1014              | 1.2                    | -                    |
| <i>o</i> -cymene                     | 1023               | 1020              | 0.2                    | -                    |
| <i>p</i> -cymene                     | 1026               | 1022              | 0.1                    | -                    |
| <b>limonene</b>                      | 1030               | 1024              | 4.1                    | 0.5                  |
| <i>cis</i> - $\beta$ -ocimene        | 1039               | 1032              | 0.2                    | 0.1                  |
| <i>trans</i> - $\beta$ -ocimene      | 1049               | 1044              | 0.4                    | 0.5                  |
| $\gamma$ -terpinene                  | 1060               | 1054              | 2.0                    | 0.1                  |
| terpinolene                          | 1088               | 1086              | 0.6                    | -                    |
| linalool                             | 1099               | 1095              | 1.1                    | 0.2                  |
| borneol                              | 1166               | 1165              | -                      | 0.1                  |
| terpinen-4-ol                        | 1177               | 1174              | 4.8                    | 0.2                  |
| $\alpha$ -terpineol                  | 1190               | 1186              | 0.4                    | -                    |
| ( <i>Z</i> )-methyl cinnamate        | 1303               | 1299              | -                      | 1.7                  |
| $\alpha$ -copaene                    | 1373               | 1374              | -                      | 0.6                  |
| <b>(<i>E</i>)-methyl cinnamate</b>   | 1382               | 1376              | -                      | <b>40.0</b>          |
| $\beta$ -elemene                     | 1389               | 1389              | 0.1                    | -                    |
| <b><i>trans</i>-caryophyllene</b>    | 1415               | 1417              | 0.5                    | 4.2                  |
| guaiene                              | 1435               | 1437              | -                      | 0.2                  |
| $\alpha$ -himalechene                | 1444               | 1449              | 2.4                    | -                    |
| $\alpha$ -neoclovene                 | 1449               | 1452              | 0.1                    | -                    |
| $\alpha$ -humulene                   | 1449               | 1452              | -                      | 1.0                  |
| allo-aromandendrene                  | 1456               | 1458              | -                      | 0.3                  |
| $\alpha$ -acoradiene                 | 1467               | 1464              | 0.3                    | -                    |
| $\beta$ -chamigrene                  | 1473               | 1476              | 2.4                    | -                    |
| <i>trans</i> -cadina-1(6),4-diene    | 1473               | 1475              | -                      | 0.3                  |
| <b>germacrene D</b>                  | 1477               | 1480              | 3.1                    | 2.5                  |
| $\gamma$ -himalechene                | 1479               | 1481              | 0.8                    | -                    |
| widdra-2,4(14)-diene                 | 1482               | 1481              | 0.5                    | -                    |
| epi-cubebol                          | 1492               | 1493              | 0.8                    | -                    |
| bicyclogermacrene                    | 1495               | 1500              | 3.0                    | 2.5                  |
| <b><math>\alpha</math>-muurolene</b> | 1495               | 1500              | -                      | 0.3                  |
| $\beta$ -himachalene                 | 1499               | 1500              | 0.3                    | -                    |
| $\delta$ -cadinene                   | 1519               | 1522              | 1.0                    | 0.8                  |
| kessane                              | 1522               | 1529              | 0.8                    | -                    |
| liguloxide                           | 1524               | 1534              | 1.1                    | -                    |
| <b>hedycaryol</b>                    | 1546               | 1546              | 1.9                    | <b>8.0</b>           |
| longipinanol                         | 1570               | 1567              | 0.8                    | -                    |
| spathulenol                          | 1572               | 1577              | -                      | 0.7                  |
| guaiol                               | 1600               | 1600              | 0.3                    | 1.4                  |
| cubenol (1,10-di-epi)                | 1620               | 1618              | 3.4                    | -                    |
| eremoligenol                         | 1624               | 1629              | -                      | 2.8                  |
| $\gamma$ -eudesmol                   | 1626               | 1630              | 0.8                    | 3.5                  |
| epi- $\alpha$ -muurolol              | 1637               | 1640              | 0.8                    | -                    |

|                                     |      |      |             |            |
|-------------------------------------|------|------|-------------|------------|
| hinesol                             | 1637 | 1640 | -           | 1.0        |
| <b>himachalol</b>                   | 1642 | 1652 | <b>10.3</b> | -          |
| <b><math>\beta</math>-eudesmol</b>  | 1645 | 1649 | -           | <b>7.3</b> |
| $\alpha$ -cadinol                   | 1647 | 1652 | 0.5         | -          |
| <b><math>\alpha</math>-eudesmol</b> | 1649 | 1652 | -           | <b>7.6</b> |
| valerianol                          | 1656 | 1656 | 0.8         | 0.3        |
| 7-epi- $\alpha$ -eudesmol           | 1662 | 1662 | 1.1         | -          |
| <b><i>Total (%)</i></b>             |      |      | <b>90</b>   | <b>91</b>  |

(-) no detection; RI<sub>calc</sub>: linear retention index calculated; RI<sub>lit</sub>: linear retention index reported in literature. In bold font are highlighted compounds with content higher than 5%. The oils were analyzed in an Agilent 7890A gas chromatograph equipped with mass spectrometry as described in Perera et al [9].
